# Supplementary material for: Low Diversity and High Genetic Structure for Platonia insignis Mart., an Endangered Fruit Tree Species
Source: MDPI journal article supplement (doi:10.3390/plants13071033), 2024-04-06
Supplement: s1 [file s1]

Table S1. Outlier loci obtained for *Platonia insignis* samples.

| ID               | Sequences                                                                                                    | Blastx                                                                | % identity | % cover | Uniprot                                                                                                      | Function                                                                                                                                                                | Interpro          |
|------------------|--------------------------------------------------------------------------------------------------------------|-----------------------------------------------------------------------|------------|---------|--------------------------------------------------------------------------------------------------------------|-------------------------------------------------------------------------------------------------------------------------------------------------------------------------|-------------------|
| CLocus<br>_385   | TGCAGCTCCAATTGCAGACAT<br>TCCTTTGGCTTTCAAGGCAGA<br>AATAACCTGTTTGGCATCTTC<br>ATATCCTTTGTCCTACCAAGG<br>AATCAAAT | Endo-1,3;1,4-beta-D-<br>glucanase-like                                | 80%        | 81%     | Q6ZJQ2 (rice)                                                                                                | Hydrolase activity (group of enzymes that<br>catalyze the breaking of covalent bonds in<br>reaction with water)                                                         | none<br>predicted |
| CLocus<br>_3725  | TGCAGGTGCTGTAGGAGGTG<br>TTGCAGCTTCTCTTATTCGTG<br>TTCCTACAGAGGTTTATTTGC<br>CTTTTCTAGCTAGAAGTATGA<br>GCTTTGATT | S-adenosylmethionine<br>carrier 1,<br>chloroplastic/mitochon<br>drial | 94.44%     | 58%     | A3BIT2_ORYSJ<br>(rice)                                                                                       | Integral component of the membrane,<br>transmembrane transport                                                                                                          | none<br>predicted |
| CLocus<br>_4575  | TGCAGTAGTGACTTCTAGCAT<br>CCATGTAGCTGGGTTGTATCC<br>ATCTTTGATTTTAGGGACTCC<br>TTGAATTCCCTTCAAAAGAGA<br>AAGATGCC | Pleiotropic drug<br>resistance protein 1-<br>like isoform X1          | 72.41%     | 94%     | A0A6P5ZSC7_DURZ<br>I (durian)                                                                                | Integral component of the membrane,<br>transport activity, ATP binding                                                                                                  | none<br>predicted |
| CLocus<br>_6950  | TGCAGGTAACATCAGTAAAT<br>GACATGTACAACTTTTACAA<br>GAGTACAATGCTAGCTTGCA<br>GCTGTACAATAGTAACTTCA<br>ACAAGACCTC   | kinesin-like protein<br>KIN-14N isoform X3                            | 83.33%     | 97%     | A0A8B8NG63_9MY<br>RT ( <i>Rhodamnia<br/>argentea</i> )                                                       | ATP binding, binding/movement/<br>microtubule motor activity, cytoskeletal<br>motor activity                                                                            | none<br>predicted |
| CLocus<br>_7172  | TGCAGCTGTGAAACTAGGAT<br>CTCTAGCCAAGGAAGAAGCC<br>ATTTGTTGGATGAATATCTGT<br>TCAGTTGAGGATGATTTGCTT<br>TCAAGCAGCA | Probable WRKY<br>transcription factor 60                              | 53.57%     | 91%     | A0A8B8NNR4_9MY<br>RT ( <i>Rhodamnia<br/>argentea</i> )                                                       | DNA binding, transcription factor activity                                                                                                                              | none<br>predicted |
| CLocus<br>_9256  | TGCAGTTGGGCTACAAGGAT<br>CAATATGTGTGTTACGATGT<br>GCTTCGAGTCAAAAAGATGG<br>TATTAGTCCCGCCATTGGAGC<br>AAGAACTTCG  | Probable apyrase 7                                                    | 53.33%     | 97%     | Q6Z4P2 ·<br>APY2_ORYSJ (rice)                                                                                | Catalyzes hydrolysis of<br>phosphoanhydride bonds of nucleoside<br>tri- and diphosphates, nucleotide binding,<br>hydrolase activity, integral component of<br>membrane  | none<br>predicted |
| CLocus<br>_12465 | TGCAGCTAAATGGCCCATCTG<br>ACCACATAGAAAGCATTTAT<br>CTTGCTGTCCAGGAGTGAAA<br>ACAACCTGAATGATAACATC<br>AAAGGGCAGAT | 5'-3' exoribonuclease<br>3-like isoform X1                            | 78.57%     | 91%     | A0A1S4BJW1_TOB<br>AC - protein RRP6-<br>like 3 isoform X1<br>( <i>Nicotiana tabacum</i><br>(Common tobacco)) | Nucleotide and RNA binding,<br>exoribonuclease activity, integral<br>membrane component, nuclear exosome,<br>histone mRNA catabolic process, nuclear<br>polyadenylation | none<br>predicted |

|                  |                                                                                                               |                                                                 |        |     |                                                                              |                                                                                                                                                                                                                                                    |                   |
|------------------|---------------------------------------------------------------------------------------------------------------|-----------------------------------------------------------------|--------|-----|------------------------------------------------------------------------------|----------------------------------------------------------------------------------------------------------------------------------------------------------------------------------------------------------------------------------------------------|-------------------|
| CLocus<br>_16070 | TGCAGGTCCAGTGATGTCATA<br>ACTTCCAAGCCCTATCAAGTA<br>ATTGGAAGCAGAGAGAACCA<br>TTCCACCATTTGAAAAGAAAC<br>AGTAGCAAAT | Neutral ceramidase 1-<br>like                                   | 73.33% | 97% | A0A7J0EBD9_9ERIC<br>(kiwi)                                                   | Ceramidase activity (enzyme that cleaves<br>fatty acids from ceramide, producing<br>sphingosine which in turn is<br>phosphorylated by a sphingosine kinase to<br>form sphingosine-1-phosphate), kinase,<br>phosphorylation, hydrolase, transferase | none<br>predicted |
| CLocus<br>_18131 | TGCAGGTACTCTCCCTTCAGA<br>CCTAAGGAACCTTACTCAACT<br>AGAGAGGTTAGAGCTCCAAT<br>GGAACAATATCTCTGGCCCTT<br>TGCCTAGTT  | Receptor protein<br>kinase TMK1-like<br>isoform X1              | 93.10% | 94% | A0A6P5T5E6 ·<br>A0A6P5T5E6_PRUA<br>V - (Cherry) ( <i>Cerasus<br/>avium</i> ) | Integral component of membrane, ATP<br>binding, kinase activity, protein<br>phosphorylation                                                                                                                                                        | none<br>predicted |
| CLocus<br>_18216 | TGCAGTTCACAAGGAACTAA<br>AGTAACGTTACCTCGAGACCT<br>GAAAGAGCATTCCAAGAAGA<br>CAAAGGTTCAACGGCAGAAT<br>CATCGATGAGA  | Protein phosphatase 1<br>regulatory subunit<br>pprA             | 75.00% | 65% | A0A654FLL7 ·<br>A0A654FLL7_ARAT<br>H - <i>Arabidopsis</i>                    | Not found                                                                                                                                                                                                                                          | none<br>predicted |
| CLocus<br>_18499 | TGCAGGTTTCCAAGCTTTATG<br>AGGTTGTGCCTCCAGTTCTTC<br>ATGAGCTGGGCAAGGCATGT<br>GCATTTTCTTACTGGAGCGTA<br>AGGTATGCC  | Low Quality Protein:<br>citrate synthase,<br>mitochondrial-like | 88.24% | 55% | P20115 ·<br>CISY4_ARATH                                                      | Citrate synthase is found in almost all<br>cells capable of oxidative metabolism. A                                                                                                                                                                | none<br>predicted |
